# Supplementary material for: Sensory filtering disruption caused by poly I:C - Timing of exposure and other experimental considerations
Source: PubMed Central journal article supplement — Brain Behav Immun Health. 2020 Oct 8;9:100156. doi: 10.1016/j.bbih.2020.100156 (PMC8474281; doi:10.1016/j.bbih.2020.100156), 2020-10-08
Supplement: mmc1.pdf [file mmc1.pdf]

## Supplemental Information

Table S1: Primer

| Gene         | Accession # | Forward                    | Reverse                     | Size |
|--------------|-------------|----------------------------|-----------------------------|------|
| <b>Il6</b>   | NM_012589.2 | 5'-GCCAGAGTCATTCAGAGCAA-3' | 5' CATTGGAAGTTGGGGTAGGA-3'  | 99   |
| <b>Il-10</b> | NM_012854.2 | 5'-CCTGGGAGAGAAGCTGAAGA-3' | 5'-TGGCCTTGTAGACACCTTTG-3'  | 139  |
| <b>Tnfa</b>  | NM_012675.3 | 5'-GAAACACACGAGACGCTGAA-3' | 5'-ATCCA CT CAGGCATCGACA-3' | 121  |
| <b>Ifng</b>  | NM_138880.2 | 5-'ACAACCCACAGATCCAGCAC-3' | 5'-GACTCCTTTTCCGCTTCCTT-3'  | 121  |

Table and figure S2: Influence of Skewness and Kurtosis on sample bias

| <b>Absolute Skewness</b> |                                 |         |
|--------------------------|---------------------------------|---------|
| Sample size              | Pearson Correlation coefficient | p-value |
| <b>2</b>                 | 0.436                           | 0.013   |
| <b>3</b>                 | 0.491                           | <0.01   |
| <b>4</b>                 | 0.495                           | <0.01   |
| <b>5</b>                 | 0.421                           | 0.016   |
| <b>6</b>                 | 0.598                           | 0.014   |
| <b>7</b>                 | 0.662                           | <0.01   |
| <b>Kurtosis</b>          |                                 |         |
| Sample size              | Pearson Correlation coefficient | p-value |
| <b>2</b>                 | 0.736                           | <0.01   |
| <b>3</b>                 | 0.802                           | <0.01   |
| <b>4</b>                 | 0.757                           | <0.01   |
| <b>5</b>                 | 0.681                           | <0.01   |
| <b>6</b>                 | 0.819                           | <0.01   |
| <b>7</b>                 | 0.81                            | <0.01   |

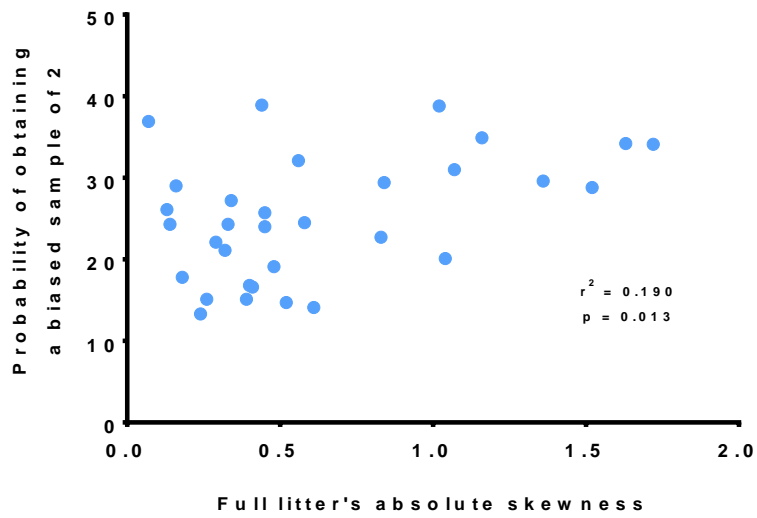

Correlation between the probability of obtaining a biased sample from a litter and the whole litter's absolute skewness or kurtosis.
